# Supplementary material
Source: Research Square preprint supplement (doi:10.21203/rs.3.rs-9305529/v1)
Supplement: Supplementary file 1 [file 09bf7d8e2c96376f68d22f6f.xlsx]

## Sheet: Study list and links
	Study	DOI or another link
	C. Song et al. (2020)	https://doi.org/10.3390/foods9040511
	C. Song et al. (2022)	https://doi.org/10.3390/foods11213421
	J. S. Liu et al. (2024)	https://doi.org/10.3389/fpubh.2023.1346577
	Rizzoli et al. (2021)	https://doi.org/10.3390/foods10102484
	Sha et al. (2024)	https://www.researchgate.net/publication/383662905_Assessment_of_the_synergy_degree_of_China's_food_safety_risk_governance_policy_tools_based_on_text_mining_and_machine_learning_methods#:~:text=Existing%20studies%20have%20overlooked%20the%20synergistic%20e%EF%AC%80ects%20among%20policy%20tools,level%20are%20crucial%20for%20enhancing
	Tiozzo et al. (2020)	https://doi.org/10.2196/23438
	Yue et al. (2015)	https://doi.org/10.1016/j.datak.2015.04.008
	Chen et al. (2024)	https://doi.org/10.1109/TMM.2024.3373249
	Dongyu Zhang et al. (2024)	https://doi.org/10.1109/BigData62323.2024.10825369
	F. L. Yang et al. (2012)	https://doi.org/10.1049/cp.2012.2399
	Gillani & Ko (2014)	https://doi.org/10.1007/978-3-319-10178-1_8
	Hu et al. (2022)	https://aclanthology.org/2022.lrec-1.668/
	Kuttiyapillai & Rajeswari (2015)	https://doi.org/10.1504/IJDMB.2015.070072
	N. Lee et al. (2023)	https://doi.org/10.1109/ICISS59129.2023.10291540
	Narasimhan et al. (2016)	https://doi.org/10.18653/v1/d16-1261
	Novoa et al. (2024)	https://doi.org/10.1016/j.fct.2024.114638
	Qi et al. (2019)	https://doi.org/10.1088/1742-6596/1237/2/022159
	Sonnenburg et al. (2024)	https://doi.org/10.1016/j.tox.2024.153933
	Tao et al. (2023a)	https://doi.org/10.3390/foods12142769
	X. Yang et al. (2012)	https://doi.org/10.1007/978-3-642-31020-1_19
	Y. Li et al. (2021)	https://doi.org/10.1145/3433538
	Yu (2018)	https://doi.org/10.1109/CISP-BMEI.2018.8633272
	Zhao et al. (2024)	https://doi.org/10.1007/s13042-024-02304-2
	Bowei et al. (2012)	https://doi.org/10.1109/ICSESS.2012.6269402
	Dachuan Zhang et al. (2020)	https://doi.org/10.1016/j.foodchem.2020.126470
	Han et al. (2012)	https://doi.org/10.1109/WCICA.2012.6357969
	Karthick et al. (2024)	https://doi.org/10.1109/I-SMAC61858.2024.10714868
	Kate et al. (2014a)	https://doi.org/10.1145/2623330.2623369
	Su et al. (2010)	https://doi.org/10.1109/WCICA.2010.5554839
	Y. Yang et al. (2011)	https://doi.org/10.1109/CCIS.2011.6045028
	Y. Yang et al. (2013)	https://doi.org/10.23919/CJE.2013.10285712
	Zhou et al. (2012)	https://doi.org/10.1109/FSKD.2012.6233856
	J. Wang et al. (2019)	https://doi.org/10.1109/ICMLA.2019.00228
	Amato et al. (2020)	https://doi.org/10.1007/978-3-030-15032-7_102
	Chenze et al. (2022)	https://doi.org/10.1109/IRI54793.2022.00038
	Dong et al. (2021)	https://doi.org/10.1109/CCDC52312.2021.9601522
	E. Lee et al. (2021)	https://doi.org/10.1109/IRI51335.2021.00042
	Makridis et al. (2023)	https://doi.org/10.1007/s10994-022-06151-6
	Q. Wang et al. (2022)	https://doi.org/10.1109/IIP57348.2022.00011
	Ren et al. (2023)	https://doi.org/10.3390/app13158609
	Shiyong Xiong & Bai (2023)	https://doi.org/10.1109/ICFTIC59930.2023.10456298
	X. K. Zhang & Peng (2022)	https://doi.org/10.1007/978-3-031-17120-8_19
	Yuan et al. (2023)	https://doi.org/10.1007/978-3-031-17120-8_19
	Rosyadi et al. (2024)	https://www.researchgate.net/publication/387956246_Ingredients_Identification_Through_Label_Scanning_Using_PaddleOCR_and_ChatGPT_for_Information_Retrieval
	Shi et al. (2022)	https://doi.org/10.1109/ICISCAE55891.2022.9927669
	C. K. H. Lee (2023)	https://tinyurl.com/3ks8zmtu
	Chung et al. (2019)	https://doi.org/10.1108/JCOM-08-2018-0072
	F. Li et al. (2015)	https://doi.org/10.1109/CCBD.2015.36
	H. Zhang et al. (2023)	https://doi.org/10.1016/j.crfs.2023.100468
	Hsieh et al. (2012)	https://aclanthology.org/P12-3028/
	Latino et al. (2023)	https://doi.org/10.13165/IE-23-17-1-09
	Murphy et al. (2022)	https://doi.org/10.1039/d1ra09383e
	Prabhune et al. (2024)	https://doi.org/10.7759/cureus.64426
	R. Liu et al. (2023)	https://doi.org/10.3390/foods12051033
	Tse et al. (2016)	https://doi.org/10.1108/IMDS-10-2015-0417
	Vasilescu et al. (2023)	https://doi.org/10.1177/13634593231173807
	Xia et al. (2022)	https://doi.org/10.3390/foods11182909
	Y. Lu et al. (2015)	https://aclanthology.org/Y15-1065/
	Y. Song et al. (2016)	https://doi.org/10.1016/j.chb.2016.02.086
	Z. Xu et al. (2024)	https://doi.org/10.20965/jaciii.2024.p0990
	B. Song et al. (2020)	https://doi.org/10.3233/ATDE200094
	B. Song et al. (2022)	https://doi.org/10.1155/2022/8971882
	Barbosa et al. (2019)	https://doi.org/10.1007/978-3-030-31372-2_21
	Chang et al. (2020)	https://doi.org/10.1371/journal.pone.0228035
	Dong et al. (2020)	https://doi.org/10.1109/AEECA49918.2020.9213565
	Effland et al. (2018)	https://doi.org/10.1093/jamia/ocx093
	Filgueiras et al. (2019)	https://doi.org/10.18653/v1/D19-5107
	Gao et al. (2021)	https://doi.org/10.1007/978-3-030-90888-1_28
	Goldberg et al. (2022)	https://doi.org/10.1111/risa.13651
	H. Li et al. (2013)	https://doi.org/10.1109/Argo-Geoinformatics.2013.6621967
	Hassani (2024)	https://doi.org/10.1109/RE59067.2024.00065
	Hu et al. (2023)	https://doi.org/10.1109/BigData59044.2023.10386694
	Huang et al. (2022)	https://doi.org/10.1155/2022/4209732
	Karamanolakis et al. (2019)	https://doi.org/10.18653/v1/D19-5501
	Kate et al. (2014b)	https://doi.org/10.3233/978-1-61499-432-9-1090
	Lopes-Cardoso et al. (2021)	https://doi.org/10.3390/info12120525
	Magalhães et al. (2019)	https://doi.org/10.33965/bigdaci2019_201907c025
	Magalhães et al. (2020)	https://doi.org/10.1007/978-3-030-45691-7_41
	Maphenduka et al. (2024)	https//doi.org/10.1109/ZCICT63770.2024.10958300
	Mejia et al. (2019)	https://doi.org/10.1287/isre.2019.0866
	Monakhova et al. (2011)	https://www.researchgate.net/profile/Dirk-Lachenmeier/publication/224941135_Automated_Classification_of_Web_Pages_for_Identification_of_Suspicious_Food_Products_-_a_Feasibility_Study/links/5d35c2a392851cd0467c58e9/Automated-Classification-of-Web-Pages-for-Identification-of-Suspicious-Food-Products-a-Feasibility-Study.pdf
	Randl et al. (2024)	https://doi.org/10.18653/v1/2024.findings-acl.459
	Sadilek et al. (2013)	https://doi.org/10.1609/hcomp.v1i1.13069
	Schomberg et al. (2016)	https://doi.org/10.1371/journal.pone.0152117
	Shang et al. (2023)	https://doi.org/10.1145/3633598.3633613
	Shufeng Xiong et al. (2023)	https://doi.org/10.1016/j.heliyon.2023.e17806
	Tao et al. (2023b)	https://doi.org/10.3390/foods12203825
	van den Bulk et al. (2022)	https://doi.org/10.1016/j.crfs.2021.12.010
	Y. Zhang et al. (2024)	https://doi.org/10.28991/HIJ-2024-05-01-013
	Z. Liu et al. (2020)	https://doi.org/10.18653/v1/2020.louhi-1.15
	Z. Wang et al. (2017)	https://doi.org/10.1145/3152178.3152192
	Zuo et al. (2022)	https://doi.org/10.1007/s00003-022-01367-z
	Rocchietti et al. (2024)	https://ceur-ws.org/Vol-3802/paper27.pdf
	An (2024)	https://doi.org/10.1108/SRJ-07-2023-0412
	Glowacki et al. (2019)	https://doi.org/10.1016/j.ajic.2019.04.004
	H. Xu et al. (2024)	https://doi.org/10.1016/j.clrc.2024.100212
	Klochikhin & Fealing (2017)	https://doi.org/10.1017/9781316671788.011
	Klochikhin & Lane (2017)	https://doi.org/10.1017/9781316671788.005
	Liang et al. (2011)	https://doi.org/10.1049/cp.2011.1438
	Maier et al. (2018)	https://doi.org/10.1177/0894439317690337
	Sattari et al. (2017)	https://doi.org/10.1017/9781316671788.006
	Conway et al. (2010)	https://doi.org/10.2196/jmir.1323

## Sheet: General monitoring studies
	Study	Classified/mentioned under	Details if provided
	B. Song et al. (2020)	authorities, monitoring or decision making can benefit	collaboration with public authority --> news from Chinese customs to predict the level of influence an event would have on food safety
	B. Song et al. (2022)	authorities, monitoring or decision making can benefit	collaboration with public authority --> news from Chinese customs to predict the level of influence an event would have on food safety
	Bowei et al. (2012)	authorities, monitoring or decision making can benefit
	Dong et al. (2020)	authorities, monitoring or decision making can benefit
	Dong et al. (2021)	authorities, monitoring or decision making can benefit
	F. L. Yang et al. (2012)	authorities, monitoring or decision making can benefit
	F. Li et al. (2015)	authorities, monitoring or decision making can benefit
	Gillani & Ko (2014)	authorities, monitoring or decision making can benefit	collaboration with public authority --> information extraction to assist sampling processes
	H. Li et al. (2013)	authorities, monitoring or decision making can benefit
	H. Zhang et al. (2023)	authorities, monitoring or decision making can benefit
	Han et al. (2012)	authorities, monitoring or decision making can benefit
	Hsieh et al. (2012)	authorities, monitoring or decision making can benefit
	Kate et al. (2014a)	authorities, monitoring or decision making can benefit	collaboration with public authority --> classification of complaints from citizens based on urgency
	Kuttiyapillai & Rajeswari (2015)	authorities, monitoring or decision making can benefit
	Liang et al. (2011)	authorities, monitoring or decision making can benefit
	Q. Wang et al. (2022)	authorities, monitoring or decision making can benefit
	Qi et al. (2019)	no explicit mention of benefit to food safety
	Ren et al. (2023)	authorities, monitoring or decision making can benefit
	Rocchietti et al. (2024)	authorities, monitoring or decision making can benefit
	Shi et al. (2022)	authorities, monitoring or decision making can benefit
	Shufeng Xiong et al. (2023)	authorities, monitoring or decision making can benefit
	Shiyong Xiong & Bai (2023)	authorities, monitoring or decision making can benefit
	Su et al. (2010)	authorities, monitoring or decision making can benefit
	X. K. Zhang & Peng (2022)	no explicit mention of benefit to food safety
	X. Yang et al. (2012)	authorities, monitoring or decision making can benefit
	Y. Li et al. (2021)	authorities, monitoring or decision making can benefit
	Y. Yang et al. (2013)	no explicit mention of benefit to food safety
	Y. Zhang et al. (2024)	authorities, monitoring or decision making can benefit
	Yu (2018)	authorities, monitoring or decision making can benefit
	Yuan et al. (2023)	authorities, monitoring or decision making can benefit
	Yue et al. (2015)	authorities, monitoring or decision making can benefit
	Zhao et al. (2024)	authorities, monitoring or decision making can benefit
	Zhou et al. (2012)	authorities, monitoring or decision making can benefit

## Sheet: Public opinion studies
	Study	Classified/mentioned under
	C. Song et al. (2020)	take away food as a trend
	Chung et al. (2019)	foodborne outbreak as crisis
	F. Li et al. (2015)	public opinion also useful for general monitoring
	Glowacki et al. (2019)	foodborne outbreak as crisis
	H. Li et al. (2013)	public opinion also useful for general monitoring
	H. Xu et al. (2024)	shift to green food as a trend
	H. Zhang et al. (2023)	public opinion also useful for general monitoring
	Hsieh et al. (2012)	public opinion also useful for general monitoring
	J. S. Liu et al. (2024)	food adulteration as crisis
	Latino et al. (2023)	supply chain disruption as crisis
	Maier et al. (2018)	GMO as a trend
	Murphy et al. (2022)	phasing out additives as a trend
	R. Liu et al. (2023)	foodborne outbreak as crisis
	Su et al. (2010)	public opinion also useful for general monitoring
	Tse et al. (2016)	food adulteration as crisis
	Vasilescu et al. (2023)	stance of different stakeholders for a public consultation for acrylamide
	Xia et al. (2022)	identification of different communities and investigation of their attitudes/discussion points separately
	Y. Li et al. (2021)	public opinion also useful for general monitoring
	Y. Lu et al. (2015)	public opinion used for predicting stock movements
	Y. Song et al. (2016)	how strongly people respond to content about political aspects of food safety
	Z. Xu et al. (2024)	food adulteration as crisis
	Zhou et al. (2012)	novel method for public opinion and general monitoring

## Sheet: Foodborne illness studies
	Study	Classified/mentioned under	Additional Information
	Amato et al. (2020)	remaining study	extracting entities of specific type
	Conway et al. (2010)	remaining study	building outbreak dataset with food contamination flag
	Dongyu Zhang et al. (2024)	classifying content for FBI mention
	Effland et al. (2018)	classifying content for FBI mention	restaurants
	Gao et al. (2021)	classifying content for FBI mention
	Hu et al. (2022)	classifying content for FBI mention	also mentioned in extracting attributes of events
	Hu et al. (2023)	classifying content for FBI mention
	J. Wang et al. (2019)	remaining study	keyword extraction approach developed and proposed on a foodborne illness dataset
	Karamanolakis et al. (2019)	classifying content for FBI mention	restaurants
	N. Lee et al. (2023)	classifying content for FBI mention	also mentioned in extracting attributes of events
	Sadilek et al. (2013)	classifying content for FBI mention	restaurants via social media
	Tao et al. (2023a)	classifying content for FBI mention	also mentioned in extracting attributes of events
	Tao et al. (2023b)	remaining study	predicting etiologies based on food vehicles
	Z. Liu et al. (2020)	classifying content for FBI mention	restaurants
	Z. Wang et al. (2017)	classifying content for FBI mention	restaurants

## Sheet: Infringement monitoring studies
	Study	Classified/mentioned under	Details
	Barbosa et al. (2019)	citizen complaints about potential infringements	economic activity + severity of the infringement + whether institute itself is competent (or at least a combination of these)
	Chang et al. (2020)	food fraud	using invoices of oil producers to identify fraudulent oil producers, TC helps with identificaton of invoices that are really related to edible oil production/sale
	C. K. H. Lee (2023)	code violations	violations by restaurants. Examines whether restaurant reviews can help predict inspection scores from NYC DOHMH
	Filgueiras et al. (2019)	citizen complaints about potential infringements	economic activity + severity of the infringement + whether institute itself is competent (or at least a combination of these)
	Kate et al. (2014b)	code violations, but mentioned together with citizen complaints	mention of any violation by any kind of establishment based on user posts + complaints etc. TC is really aimed for that.
	Lopes-Cardoso et al. (2021)	citizen complaints about potential infringements	economic activity + severity of the infringement + whether institute itself is competent (or at least a combination of these)
	Magalhães et al. (2019)	citizen complaints about potential infringements	economic activity + severity of the infringement + whether institute itself is competent (or at least a combination of these)
	Magalhães et al. (2020)	citizen complaints about potential infringements	economic activity + severity of the infringement + whether institute itself is competent (or at least a combination of these)
	Mejia et al. (2019)	code violations	violations by restaurants. Examines whether restaurant reviews can help predict inspection scores from NYC DOHMH + also calculate a score indicate hygiene for restaurants to investigate the score over time
	Narasimhan et al. (2016)	food fraud	proposing a new approach to extract information - testing it on a dataset about food fraud to extract adulterated food, adulterant and the location where adulteration occurred
	Prabhune et al. (2024)	code violations	violations by restaurants. Identified reviews that contained negative attitude about hygiene of restaurants, tested whether a spike in negative reviews in a particular period is coincidential, also manually identified sub-category of violation to calculate severity mentioned in the reviews
	Schomberg et al. (2016)	code violations	violations by restaurants. Examines whether restaurant reviews can help predict inspection scores, not sure where the scores come from

## Sheet: Academic work studies
	Study	Classified/mentioned under
	Klochikhin & Fealing (2017)	main topics of food safety research & funding
	Klochikhin & Lane (2017)	main topics of food safety research & funding
	Sattari et al. (2017)	main topics of food safety research & funding
	van den Bulk et al. (2022)	filter for scientific articles that mentioned chemical hazards in certain foods
	Dachuan Zhang et al. (2020)	curation of chemical names + tool that can be queried and provides info access
	Chen et al. (2024)	extracted info from food safety standards + built a graph database
	Y. Yang et al. (2011)	new information retrieval methodology to meet researcher needs
	Novoa et al. (2024)	comprehensive database of allergens and their symptoms to facilitate identification of potential new food allergens
	Sonnenburg et al. (2024)	again to facilitate systematic literature reviews, but this time extraction of unstructured information in a structured manner for chemical hazards, specifically Bisphenol A

## Sheet: Consumer empowerment studies
	Study	Classified/mentioned under
	Chenze et al. (2022)	NER system to build an app that informs users about safe storage of food
	E. Lee et al. (2021)	NER system to build an app that informs users about safe storage of food
	Karthick et al. (2024)	chatbot that answers questions and summarizes texts about food safety laws
	Maphenduka et al. (2024)	classifies product ingredient lists wrt whether they contain allergens or not
	Rizzoli et al. (2021)	investigate the knowledge and perspective of pregnant women around food safety risks
	Rosyadi et al. (2024)	system that scans ingredient list as image and retrieves safety information such as allergens
