# Supplementary material
Source: Research Square preprint supplement (doi:10.21203/rs.3.rs-9305529/v1)
Supplement: Supplementary file 2 [file 215091c0c541dc79ea1a9914.xlsx]

## Sheet: Study list and links
	Study	DOI or another link
	C. Song et al. (2020)	https://doi.org/10.3390/foods9040511
	C. Song et al. (2022)	https://doi.org/10.3390/foods11213421
	J. S. Liu et al. (2024)	https://doi.org/10.3389/fpubh.2023.1346577
	Rizzoli et al. (2021)	https://doi.org/10.3390/foods10102484
	Sha et al. (2024)	https://www.researchgate.net/publication/383662905_Assessment_of_the_synergy_degree_of_China's_food_safety_risk_governance_policy_tools_based_on_text_mining_and_machine_learning_methods#:~:text=Existing%20studies%20have%20overlooked%20the%20synergistic%20e%EF%AC%80ects%20among%20policy%20tools,level%20are%20crucial%20for%20enhancing
	Tiozzo et al. (2020)	https://doi.org/10.2196/23438
	Yue et al. (2015)	https://doi.org/10.1016/j.datak.2015.04.008
	Chen et al. (2024)	https://doi.org/10.1109/TMM.2024.3373249
	Dongyu Zhang et al. (2024)	https://doi.org/10.1109/BigData62323.2024.10825369
	F. L. Yang et al. (2012)	https://doi.org/10.1049/cp.2012.2399
	Gillani & Ko (2014)	https://doi.org/10.1007/978-3-319-10178-1_8
	Hu et al. (2022)	https://aclanthology.org/2022.lrec-1.668/
	Kuttiyapillai & Rajeswari (2015)	https://doi.org/10.1504/IJDMB.2015.070072
	N. Lee et al. (2023)	https://doi.org/10.1109/ICISS59129.2023.10291540
	Narasimhan et al. (2016)	https://doi.org/10.18653/v1/d16-1261
	Novoa et al. (2024)	https://doi.org/10.1016/j.fct.2024.114638
	Qi et al. (2019)	https://doi.org/10.1088/1742-6596/1237/2/022159
	Sonnenburg et al. (2024)	https://doi.org/10.1016/j.tox.2024.153933
	Tao et al. (2023a)	https://doi.org/10.3390/foods12142769
	X. Yang et al. (2012)	https://doi.org/10.1007/978-3-642-31020-1_19
	Y. Li et al. (2021)	https://doi.org/10.1145/3433538
	Yu (2018)	https://doi.org/10.1109/CISP-BMEI.2018.8633272
	Zhao et al. (2024)	https://doi.org/10.1007/s13042-024-02304-2
	Bowei et al. (2012)	https://doi.org/10.1109/ICSESS.2012.6269402
	Dachuan Zhang et al. (2020)	https://doi.org/10.1016/j.foodchem.2020.126470
	Han et al. (2012)	https://doi.org/10.1109/WCICA.2012.6357969
	Karthick et al. (2024)	https://doi.org/10.1109/I-SMAC61858.2024.10714868
	Kate et al. (2014a)	https://doi.org/10.1145/2623330.2623369
	Su et al. (2010)	https://doi.org/10.1109/WCICA.2010.5554839
	Y. Yang et al. (2011)	https://doi.org/10.1109/CCIS.2011.6045028
	Y. Yang et al. (2013)	https://doi.org/10.23919/CJE.2013.10285712
	Zhou et al. (2012)	https://doi.org/10.1109/FSKD.2012.6233856
	J. Wang et al. (2019)	https://doi.org/10.1109/ICMLA.2019.00228
	Amato et al. (2020)	https://doi.org/10.1007/978-3-030-15032-7_102
	Chenze et al. (2022)	https://doi.org/10.1109/IRI54793.2022.00038
	Dong et al. (2021)	https://doi.org/10.1109/CCDC52312.2021.9601522
	E. Lee et al. (2021)	https://doi.org/10.1109/IRI51335.2021.00042
	Makridis et al. (2023)	https://doi.org/10.1007/s10994-022-06151-6
	Q. Wang et al. (2022)	https://doi.org/10.1109/IIP57348.2022.00011
	Ren et al. (2023)	https://doi.org/10.3390/app13158609
	Shiyong Xiong & Bai (2023)	https://doi.org/10.1109/ICFTIC59930.2023.10456298
	X. K. Zhang & Peng (2022)	https://doi.org/10.1007/978-3-031-17120-8_19
	Yuan et al. (2023)	https://doi.org/10.1007/978-3-031-17120-8_19
	Rosyadi et al. (2024)	https://www.researchgate.net/publication/387956246_Ingredients_Identification_Through_Label_Scanning_Using_PaddleOCR_and_ChatGPT_for_Information_Retrieval
	Shi et al. (2022)	https://doi.org/10.1109/ICISCAE55891.2022.9927669
	C. K. H. Lee (2023)	https://tinyurl.com/3ks8zmtu
	Chung et al. (2019)	https://doi.org/10.1108/JCOM-08-2018-0072
	F. Li et al. (2015)	https://doi.org/10.1109/CCBD.2015.36
	H. Zhang et al. (2023)	https://doi.org/10.1016/j.crfs.2023.100468
	Hsieh et al. (2012)	https://aclanthology.org/P12-3028/
	Latino et al. (2023)	https://doi.org/10.13165/IE-23-17-1-09
	Murphy et al. (2022)	https://doi.org/10.1039/d1ra09383e
	Prabhune et al. (2024)	https://doi.org/10.7759/cureus.64426
	R. Liu et al. (2023)	https://doi.org/10.3390/foods12051033
	Tse et al. (2016)	https://doi.org/10.1108/IMDS-10-2015-0417
	Vasilescu et al. (2023)	https://doi.org/10.1177/13634593231173807
	Xia et al. (2022)	https://doi.org/10.3390/foods11182909
	Y. Lu et al. (2015)	https://aclanthology.org/Y15-1065/
	Y. Song et al. (2016)	https://doi.org/10.1016/j.chb.2016.02.086
	Z. Xu et al. (2024)	https://doi.org/10.20965/jaciii.2024.p0990
	B. Song et al. (2020)	https://doi.org/10.3233/ATDE200094
	B. Song et al. (2022)	https://doi.org/10.1155/2022/8971882
	Barbosa et al. (2019)	https://doi.org/10.1007/978-3-030-31372-2_21
	Chang et al. (2020)	https://doi.org/10.1371/journal.pone.0228035
	Dong et al. (2020)	https://doi.org/10.1109/AEECA49918.2020.9213565
	Effland et al. (2018)	https://doi.org/10.1093/jamia/ocx093
	Filgueiras et al. (2019)	https://doi.org/10.18653/v1/D19-5107
	Gao et al. (2021)	https://doi.org/10.1007/978-3-030-90888-1_28
	Goldberg et al. (2022)	https://doi.org/10.1111/risa.13651
	H. Li et al. (2013)	https://doi.org/10.1109/Argo-Geoinformatics.2013.6621967
	Hassani (2024)	https://doi.org/10.1109/RE59067.2024.00065
	Hu et al. (2023)	https://doi.org/10.1109/BigData59044.2023.10386694
	Huang et al. (2022)	https://doi.org/10.1155/2022/4209732
	Karamanolakis et al. (2019)	https://doi.org/10.18653/v1/D19-5501
	Kate et al. (2014b)	https://doi.org/10.3233/978-1-61499-432-9-1090
	Lopes-Cardoso et al. (2021)	https://doi.org/10.3390/info12120525
	Magalhães et al. (2019)	https://doi.org/10.33965/bigdaci2019_201907c025
	Magalhães et al. (2020)	https://doi.org/10.1007/978-3-030-45691-7_41
	Maphenduka et al. (2024)	https//doi.org/10.1109/ZCICT63770.2024.10958300
	Mejia et al. (2019)	https://doi.org/10.1287/isre.2019.0866
	Monakhova et al. (2011)	https://www.researchgate.net/profile/Dirk-Lachenmeier/publication/224941135_Automated_Classification_of_Web_Pages_for_Identification_of_Suspicious_Food_Products_-_a_Feasibility_Study/links/5d35c2a392851cd0467c58e9/Automated-Classification-of-Web-Pages-for-Identification-of-Suspicious-Food-Products-a-Feasibility-Study.pdf
	Randl et al. (2024)	https://doi.org/10.18653/v1/2024.findings-acl.459
	Sadilek et al. (2013)	https://doi.org/10.1609/hcomp.v1i1.13069
	Schomberg et al. (2016)	https://doi.org/10.1371/journal.pone.0152117
	Shang et al. (2023)	https://doi.org/10.1145/3633598.3633613
	Shufeng Xiong et al. (2023)	https://doi.org/10.1016/j.heliyon.2023.e17806
	Tao et al. (2023b)	https://doi.org/10.3390/foods12203825
	van den Bulk et al. (2022)	https://doi.org/10.1016/j.crfs.2021.12.010
	Y. Zhang et al. (2024)	https://doi.org/10.28991/HIJ-2024-05-01-013
	Z. Liu et al. (2020)	https://doi.org/10.18653/v1/2020.louhi-1.15
	Z. Wang et al. (2017)	https://doi.org/10.1145/3152178.3152192
	Zuo et al. (2022)	https://doi.org/10.1007/s00003-022-01367-z
	Rocchietti et al. (2024)	https://ceur-ws.org/Vol-3802/paper27.pdf
	An (2024)	https://doi.org/10.1108/SRJ-07-2023-0412
	Glowacki et al. (2019)	https://doi.org/10.1016/j.ajic.2019.04.004
	H. Xu et al. (2024)	https://doi.org/10.1016/j.clrc.2024.100212
	Klochikhin & Fealing (2017)	https://doi.org/10.1017/9781316671788.011
	Klochikhin & Lane (2017)	https://doi.org/10.1017/9781316671788.005
	Liang et al. (2011)	https://doi.org/10.1049/cp.2011.1438
	Maier et al. (2018)	https://doi.org/10.1177/0894439317690337
	Sattari et al. (2017)	https://doi.org/10.1017/9781316671788.006
	Conway et al. (2010)	https://doi.org/10.2196/jmir.1323

## Sheet: Corpora_overall
	Dataset	Openly available	Study count	Used in studies	NLP tasks	Food safety task	Data source	Creation - how?	Annotators mapping
	Dataset 1		3	Effland et al. (2018), Karamanolakis et al. (2019), Z. Liu et al. (2020)	text classification	foodborne illness monitoring	product/service reviews	manual by DOHMH epidemiologists combined with the annotations of prototype classifier	expert
	Dataset 2		3	Hu et al. (2022), Hu et al. (2023), Dongyu Zhang et al. (2024)	text classification|NER|information extraction	foodborne illness monitoring	social media	manually by crowdsourcing and graduate students from data science or food science	crowdsourcing + student / research assistant
	Dataset 3		5	Barbosa et al. (2019), Filgueiras et al. (2019), Lopes-Cardoso et al. (2021), Magalhaes et al. (2019), Magalhaes et al. (2020)	text classification	infringement monitoring	complaints	manual by ASAE officials	expert
	Dataset 4		2	B. Song et al. (2020), B. Song et al. (2022)	text classification	general monitoring	news	manually by custom officials	expert
	Dataset 5	yes	1	Randl et al. (2024)	text classification	product recall monitoring	inspection/incident announcements	manual by domain experts	expert
	Dataset 6		1	Makridis et al. (2023)	NER|text classification	product recall monitoring	inspection/incident announcements|news	we assume manual, not mentioned	no info
	Dataset 7		1	N. Lee et al. (2023)	text classification	foodborne illness monitoring|product recall monitoring	complaints	manual annotations by SFA experts to build a prototype classifier and heuristic classifier, then verified by experts again	expert
	Dataset 8		1	N. Lee et al. (2023)	text classification|information extraction	foodborne illness monitoring|product recall monitoring	news	heuristic or algorithm annotations verified by SFA experts	expert
	Dataset 9		1	Chenze et al. (2022), E. Lee et al. (2021)	NER	consumer empowerment	social media	most of the training dataset silver coming from FoodKeeper	no info
	Dataset 10		1	Chen et al. (2024)	NER	academic work support	policy tools	manually by authors	authors
	Dataset 11		1	Gao et al. (2021)	text classification	foodborne illness monitoring	social media	manual by public health graduate students
	Dataset 12		1	Goldberg et al. (2022)	text classification	online sales monitoring	product/service reviews|complaints	manual by business students and food scientist with a PhD but also automatic because they assumed labels for texts coming from IWasPoisoned.com	expert + student / research assistant
	Dataset 13		1	Huang et al. (2022)	text classification	online sales monitoring	product/service reviews	manually	no info
	Dataset 14		1	Mejia et al. (2019)	text classification	infringement monitoring	product/service reviews	manually via crowdsourcing	crowdsourcing
	Dataset 15		1	Monakhova et al. (2011)	text classification	online sales monitoring	product description	manually by experts	expert
	Dataset 16		1	Ren et al. (2023)	NER	general monitoring	unspecified websites	manually by authors	authors
	Dataset 17		1	Sadilek et al. (2023)	text classification	foodborne illness monitoring	social media	manual by crowdsourcing combined with active learning in multiple iterations	crowdsourcing
	Dataset 18		1	Y. Song et al. (2016)	sentiment analysis	public opinion	social media	manually	no info
	Dataset 19	yes	1	van den Bulk et al. (2022)	text classification	academic work support	scientific texts	manually by domain experts	expert
	Dataset 20		1	Q.Wang et al. (2022)	NER	general monitoring	education materials	manually by domain experts	expert
	Dataset 21		1	H. Zhang et al. (2023)	sentiment analysis	public opinion|general monitoring	news|social media|inspection/incident announcements	manually by authors	authors
	Dataset 22		1	X. K. Zhang & Peng (2022)	NER	general monitoring	news	manually by authors	authors
	Dataset 23		1	Zuo et al. (2022)	text classification	online sales monitoring	product/service reviews	manually by experts with CS or food science bachelor degrees	experts?
	Dataset 24	yes	1	Conway et al. (2010)		foodborne illness monitoring	news	manually	no info
	Dataset 25		1	Shufeng Xiong et al. (2023)	text classification	general monitoring	news	manually by authors	authors
	Dataset 26		1	Chung et al. (2019)	text classification|sentiment analysis	public opinion	social media	manually by research assistants, discipline not specified	student / research assistant
	Dataset 27		1	Y. Lu et al. (2015)	sentiment analysis	public opinion	social media	manually	no info
	Dataset 28		1	Yuan et al. (2023)	NER	general monitoring	product/service reviews	manually by domain experts	experts
	Dataset 29		1	Shiyong Xiong & Bai (2023)	text classification|NER	general monitoring	news|inspection/incident announcements	manually by experts	experts
	Dataset 30		1	Kate et al. (2014a)	text classification	general monitoring	news	manually by experts combined with silver annotations for content coming from a newsletter	experts
	Dataset 31		1	Kate et al. (2014b)	text classification	infringement monitoring	social media|complaints	manually combined with silver annotations for content coming from Wikipedia category tree and complaints	no info
	Dataset 32		1	J. Wang et al. (2019)	keyword extraction	foodborne illness monitoring	scientific texts	manually by experts combined with unsupervised learning approach	experts
	Dataset 33		1	Chang et al. (2020)	text classification	infringement monitoring	e-invoices	manually by authors via "eyeballing"	authors
	Dataset 34		1	Shang et al. (2023)	text classification	fake news	fact-checking platforms	completely silver based on the sources	completely silver
	Dataset 35		1	Dong et al. (2020)	text classification	general monitoring	news|inspection/incident announcements	we assume silver, not mentioned	no info
	Dataset 36		1	Dong et al. (2021)	NER	general monitoring	news|food safety cases	we assume manual, not mentioned	no info
	Dataset 37		1	Y. Li et al. (2021)	information extraction|sentiment analysis	general monitoring|public opinion	social media|news	not mentioned	no info
	Dataset 38		1	F. L. Yang et al. (2012)	text classification	general monitoring	unspecified websites	manual combined with heuristic and a text classifier	no info
	Dataset 39		1	Hassani (2024)	text classification	policy analysis	policy tools	not mentioned	no info
	Dataset 40		1	Zhao et al. (2024)	information extraction	general monitoring	inspection/incident announcements	manual	no info
	Dataset 41		1	Maphenduka et al. (2024)	text classification	consumer empowerment	ingredient lists	silver based on allergen database	completely silver
	Dataset 42		1	Rocchietti et al. (2024)	text summarization	general monitoring	news|scientific texts	manual by domain experts	experts
	Dataset 43	yes	1	Sonnenburg et al. (2024)	information extraction	academic work support|chemical hazard monitoring	scientific texts	manual by domain experts	experts

## Sheet: Corpora_details_for_paper
	Dataset	Used in studies	Is annotation creation explained	Annotation process	Automatic process - a classifier?	Human annotator
	Dataset 1	Effland et al. (2018), Karamanolakis et al. (2019), Z. Liu et al. (2020)	yes	manual + automatic process	yes	expert
	Dataset 2	Hu et al. (2022), Hu et al. (2023), Dongyu Zhang et al. (2024)	yes	manual	not relevant	crowdsourcing + student / research assistant
	Dataset 3	Barbosa et al. (2019), Filgueiras et al. (2019), Lopes-Cardoso et al. (2021), Magalhaes et al. (2019), Magalhaes et al. (2020)	yes	manual	not relevant	expert
	Dataset 4	B. Song et al. (2020), B. Song et al. (2022)	yes	manual	not relevant	expert
	Dataset 5	Randl et al. (2024)	yes	manual	not relevant	expert
	Dataset 6	Makridis et al. (2023)	no	no info	not relevant	no info
	Dataset 7	N. Lee et al. (2023)	yes	manual + automatic process	yes	expert
	Dataset 8	N. Lee et al. (2023)	yes	manual + automatic process	no	expert
	Dataset 9	Chenze et al. (2022), E. Lee et al. (2021)	yes	completely automatic process	no	not relevant
	Dataset 10	Chen et al. (2024)	yes	manual	not relevant	authors
	Dataset 11	Gao et al. (2021)	yes	manual	not relevant	student / research assistant
	Dataset 12	Goldberg et al. (2022)	yes	manual + automatic process	no	expert + student / research assistant
	Dataset 13	Huang et al. (2022)	yes	manual	not relevant	no info
	Dataset 14	Mejia et al. (2019)	yes	manual	not relevant	crowdsourcing
	Dataset 15	Monakhova et al. (2011)	yes	manual	not relevant	expert
	Dataset 16	Ren et al. (2023)	yes	manual	not relevant	authors
	Dataset 17	Sadilek et al. (2023)	yes	manual + automatic process	yes	crowdsourcing
	Dataset 18	Y. Song et al. (2016)	yes	manual	not relevant	no info
	Dataset 19	van den Bulk et al. (2022)	yes	manual	not relevant	expert
	Dataset 20	Q.Wang et al. (2022)	yes	manual	not relevant	expert
	Dataset 21	H. Zhang et al. (2023)	yes	manual	not relevant	authors
	Dataset 22	X. K. Zhang & Peng (2022)	yes	manual	not relevant	authors
	Dataset 23	Zuo et al. (2022)	yes	manual	not relevant	experts
	Dataset 24	Conway et al. (2010)	yes	manual	not relevant	no info
	Dataset 25	Shufeng Xiong et al. (2023)	yes	manual	not relevant	authors
	Dataset 26	Chung et al. (2019)	yes	manual	not relevant	student / research assistant
	Dataset 27	Y. Lu et al. (2015)	yes	manual	not relevant	no info
	Dataset 28	Yuan et al. (2023)	yes	manual	not relevant	experts
	Dataset 29	Shiyong Xiong & Bai (2023)	yes	manual	not relevant	experts
	Dataset 30	Kate et al. (2014a)	yes	manual + automatic process	yes	experts
	Dataset 31	Kate et al. (2014b)	yes	manual + automatic process	no	no info
	Dataset 32	J. Wang et al. (2019)	yes	manual + automatic process	no	experts
	Dataset 33	Chang et al. (2020)	yes	manual	not relevant	authors
	Dataset 34	Shang et al. (2023)	yes	completely automatic process	no	completely silver
	Dataset 35	Dong et al. (2020)	no	no info	not relevant	no info
	Dataset 36	Dong et al. (2021)	no	no info	not relevant	no info
	Dataset 37	Y. Li et al. (2021)	no	no info	not relevant	no info
	Dataset 38	F. L. Yang et al. (2012)	yes	manual + automatic process	yes	no info
	Dataset 39	Hassani (2024)	no	no info	not relevant	no info
	Dataset 40	Zhao et al. (2024)	yes	manual	not relevant	no info
	Dataset 41	Maphenduka et al. (2024)	yes	completely automatic process	no	not relevant
	Dataset 42	Rocchietti et al. (2024)	yes	manual	not relevant	expert
	Dataset 43	Sonnenburg et al. (2024)	yes	manual	not relevant	expert
