# Supplementary material
Source: Research Square preprint supplement (doi:10.21203/rs.3.rs-9305529/v1)
Supplement: Supplementary file 3 [file 357a5ea1d580569619cd4e5e.xlsx]

## Sheet: Study list and links
	Study	DOI or another link
	C. Song et al. (2020)	https://doi.org/10.3390/foods9040511
	C. Song et al. (2022)	https://doi.org/10.3390/foods11213421
	J. S. Liu et al. (2024)	https://doi.org/10.3389/fpubh.2023.1346577
	Rizzoli et al. (2021)	https://doi.org/10.3390/foods10102484
	Sha et al. (2024)	https://www.researchgate.net/publication/383662905_Assessment_of_the_synergy_degree_of_China's_food_safety_risk_governance_policy_tools_based_on_text_mining_and_machine_learning_methods#:~:text=Existing%20studies%20have%20overlooked%20the%20synergistic%20e%EF%AC%80ects%20among%20policy%20tools,level%20are%20crucial%20for%20enhancing
	Tiozzo et al. (2020)	https://doi.org/10.2196/23438
	Yue et al. (2015)	https://doi.org/10.1016/j.datak.2015.04.008
	Chen et al. (2024)	https://doi.org/10.1109/TMM.2024.3373249
	Dongyu Zhang et al. (2024)	https://doi.org/10.1109/BigData62323.2024.10825369
	F. L. Yang et al. (2012)	https://doi.org/10.1049/cp.2012.2399
	Gillani & Ko (2014)	https://doi.org/10.1007/978-3-319-10178-1_8
	Hu et al. (2022)	https://aclanthology.org/2022.lrec-1.668/
	Kuttiyapillai & Rajeswari (2015)	https://doi.org/10.1504/IJDMB.2015.070072
	N. Lee et al. (2023)	https://doi.org/10.1109/ICISS59129.2023.10291540
	Narasimhan et al. (2016)	https://doi.org/10.18653/v1/d16-1261
	Novoa et al. (2024)	https://doi.org/10.1016/j.fct.2024.114638
	Qi et al. (2019)	https://doi.org/10.1088/1742-6596/1237/2/022159
	Sonnenburg et al. (2024)	https://doi.org/10.1016/j.tox.2024.153933
	Tao et al. (2023a)	https://doi.org/10.3390/foods12142769
	X. Yang et al. (2012)	https://doi.org/10.1007/978-3-642-31020-1_19
	Y. Li et al. (2021)	https://doi.org/10.1145/3433538
	Yu (2018)	https://doi.org/10.1109/CISP-BMEI.2018.8633272
	Zhao et al. (2024)	https://doi.org/10.1007/s13042-024-02304-2
	Bowei et al. (2012)	https://doi.org/10.1109/ICSESS.2012.6269402
	Dachuan Zhang et al. (2020)	https://doi.org/10.1016/j.foodchem.2020.126470
	Han et al. (2012)	https://doi.org/10.1109/WCICA.2012.6357969
	Karthick et al. (2024)	https://doi.org/10.1109/I-SMAC61858.2024.10714868
	Kate et al. (2014a)	https://doi.org/10.1145/2623330.2623369
	Su et al. (2010)	https://doi.org/10.1109/WCICA.2010.5554839
	Y. Yang et al. (2011)	https://doi.org/10.1109/CCIS.2011.6045028
	Y. Yang et al. (2013)	https://doi.org/10.23919/CJE.2013.10285712
	Zhou et al. (2012)	https://doi.org/10.1109/FSKD.2012.6233856
	J. Wang et al. (2019)	https://doi.org/10.1109/ICMLA.2019.00228
	Amato et al. (2020)	https://doi.org/10.1007/978-3-030-15032-7_102
	Chenze et al. (2022)	https://doi.org/10.1109/IRI54793.2022.00038
	Dong et al. (2021)	https://doi.org/10.1109/CCDC52312.2021.9601522
	E. Lee et al. (2021)	https://doi.org/10.1109/IRI51335.2021.00042
	Makridis et al. (2023)	https://doi.org/10.1007/s10994-022-06151-6
	Q. Wang et al. (2022)	https://doi.org/10.1109/IIP57348.2022.00011
	Ren et al. (2023)	https://doi.org/10.3390/app13158609
	Shiyong Xiong & Bai (2023)	https://doi.org/10.1109/ICFTIC59930.2023.10456298
	X. K. Zhang & Peng (2022)	https://doi.org/10.1007/978-3-031-17120-8_19
	Yuan et al. (2023)	https://doi.org/10.1007/978-3-031-17120-8_19
	Rosyadi et al. (2024)	https://www.researchgate.net/publication/387956246_Ingredients_Identification_Through_Label_Scanning_Using_PaddleOCR_and_ChatGPT_for_Information_Retrieval
	Shi et al. (2022)	https://doi.org/10.1109/ICISCAE55891.2022.9927669
	C. K. H. Lee (2023)	https://tinyurl.com/3ks8zmtu
	Chung et al. (2019)	https://doi.org/10.1108/JCOM-08-2018-0072
	F. Li et al. (2015)	https://doi.org/10.1109/CCBD.2015.36
	H. Zhang et al. (2023)	https://doi.org/10.1016/j.crfs.2023.100468
	Hsieh et al. (2012)	https://aclanthology.org/P12-3028/
	Latino et al. (2023)	https://doi.org/10.13165/IE-23-17-1-09
	Murphy et al. (2022)	https://doi.org/10.1039/d1ra09383e
	Prabhune et al. (2024)	https://doi.org/10.7759/cureus.64426
	R. Liu et al. (2023)	https://doi.org/10.3390/foods12051033
	Tse et al. (2016)	https://doi.org/10.1108/IMDS-10-2015-0417
	Vasilescu et al. (2023)	https://doi.org/10.1177/13634593231173807
	Xia et al. (2022)	https://doi.org/10.3390/foods11182909
	Y. Lu et al. (2015)	https://aclanthology.org/Y15-1065/
	Y. Song et al. (2016)	https://doi.org/10.1016/j.chb.2016.02.086
	Z. Xu et al. (2024)	https://doi.org/10.20965/jaciii.2024.p0990
	B. Song et al. (2020)	https://doi.org/10.3233/ATDE200094
	B. Song et al. (2022)	https://doi.org/10.1155/2022/8971882
	Barbosa et al. (2019)	https://doi.org/10.1007/978-3-030-31372-2_21
	Chang et al. (2020)	https://doi.org/10.1371/journal.pone.0228035
	Dong et al. (2020)	https://doi.org/10.1109/AEECA49918.2020.9213565
	Effland et al. (2018)	https://doi.org/10.1093/jamia/ocx093
	Filgueiras et al. (2019)	https://doi.org/10.18653/v1/D19-5107
	Gao et al. (2021)	https://doi.org/10.1007/978-3-030-90888-1_28
	Goldberg et al. (2022)	https://doi.org/10.1111/risa.13651
	H. Li et al. (2013)	https://doi.org/10.1109/Argo-Geoinformatics.2013.6621967
	Hassani (2024)	https://doi.org/10.1109/RE59067.2024.00065
	Hu et al. (2023)	https://doi.org/10.1109/BigData59044.2023.10386694
	Huang et al. (2022)	https://doi.org/10.1155/2022/4209732
	Karamanolakis et al. (2019)	https://doi.org/10.18653/v1/D19-5501
	Kate et al. (2014b)	https://doi.org/10.3233/978-1-61499-432-9-1090
	Lopes-Cardoso et al. (2021)	https://doi.org/10.3390/info12120525
	Magalhães et al. (2019)	https://doi.org/10.33965/bigdaci2019_201907c025
	Magalhães et al. (2020)	https://doi.org/10.1007/978-3-030-45691-7_41
	Maphenduka et al. (2024)	https//doi.org/10.1109/ZCICT63770.2024.10958300
	Mejia et al. (2019)	https://doi.org/10.1287/isre.2019.0866
	Monakhova et al. (2011)	https://www.researchgate.net/profile/Dirk-Lachenmeier/publication/224941135_Automated_Classification_of_Web_Pages_for_Identification_of_Suspicious_Food_Products_-_a_Feasibility_Study/links/5d35c2a392851cd0467c58e9/Automated-Classification-of-Web-Pages-for-Identification-of-Suspicious-Food-Products-a-Feasibility-Study.pdf
	Randl et al. (2024)	https://doi.org/10.18653/v1/2024.findings-acl.459
	Sadilek et al. (2013)	https://doi.org/10.1609/hcomp.v1i1.13069
	Schomberg et al. (2016)	https://doi.org/10.1371/journal.pone.0152117
	Shang et al. (2023)	https://doi.org/10.1145/3633598.3633613
	Shufeng Xiong et al. (2023)	https://doi.org/10.1016/j.heliyon.2023.e17806
	Tao et al. (2023b)	https://doi.org/10.3390/foods12203825
	van den Bulk et al. (2022)	https://doi.org/10.1016/j.crfs.2021.12.010
	Y. Zhang et al. (2024)	https://doi.org/10.28991/HIJ-2024-05-01-013
	Z. Liu et al. (2020)	https://doi.org/10.18653/v1/2020.louhi-1.15
	Z. Wang et al. (2017)	https://doi.org/10.1145/3152178.3152192
	Zuo et al. (2022)	https://doi.org/10.1007/s00003-022-01367-z
	Rocchietti et al. (2024)	https://ceur-ws.org/Vol-3802/paper27.pdf
	An (2024)	https://doi.org/10.1108/SRJ-07-2023-0412
	Glowacki et al. (2019)	https://doi.org/10.1016/j.ajic.2019.04.004
	H. Xu et al. (2024)	https://doi.org/10.1016/j.clrc.2024.100212
	Klochikhin & Fealing (2017)	https://doi.org/10.1017/9781316671788.011
	Klochikhin & Lane (2017)	https://doi.org/10.1017/9781316671788.005
	Liang et al. (2011)	https://doi.org/10.1049/cp.2011.1438
	Maier et al. (2018)	https://doi.org/10.1177/0894439317690337
	Sattari et al. (2017)	https://doi.org/10.1017/9781316671788.006
	Conway et al. (2010)	https://doi.org/10.2196/jmir.1323

## Sheet: TC_Algorithms
	Study	Rule-based	Specific algorithms	Classical ML	Specific algorithms	Deep learning	Specific algorithms	LLMs	Specific approach
	B. Song et al. (2020)			TRUE	NB, SVM, XGBoost	TRUE	FastText, CNN, LSTM, BERT
	B. Song et al. (2022)			TRUE	SVM, NB, XGBoost	TRUE	FastText, BERT, TextCNN, LSTM
	Barbosa et al. (2019)			TRUE	Random Forests, Bernoulli NB, Multinomial NB, Complement NB, k-Nearest Neighbors, SVM, Decision Tree, Extra Tree
	C. K. H. Lee (2023)			TRUE	SVM, Decision Tree, Random Forest
	Chang et al. (2020)			TRUE	KNN, SVM, Log Reg, RF	TRUE	unspecified NN
	Chung et al. (2019)			TRUE	unspecified algorithm
	Dong et al. (2020)			TRUE	SVM
	Dongyu Zhang et al. (2024)							TRUE	prompting
	Effland et al. (2018)			TRUE	logistic regression, RF, SVM, J4.8
	F. L. Yang et al. (2012)			TRUE	approach mentioned by Liu et al. (2003) - https://cdn.aaai.org/ICML/2003/ICML03-060.pdf
	Filgueiras et al. (2019)			TRUE	Bernoulli NB, Multinomial NB, Complement NB, KNeighbors, SVM, Stochastic Gradient Descent, Decision Tree Classifier, Extra Tree, Random Forests, and Bagging Classifier	TRUE	LSTM
	Gao et al. (2021)					TRUE	BiGRU
	Goldberg et al. (2022)	TRUE	Tabu search algorithm combined with CC-score	TRUE	Tabu search algorithm combined with CC-score
	H. Li et al. (2013)	TRUE	ontologies
	Hassani (2024)							TRUE	finetuning + prompting
	Hu et al. (2022)					TRUE	RoBERTa, BiLSTM, MGADE
	Hu et al. (2023)					TRUE	unspecified NN
	Huang et al. (2022)			TRUE	XGBoost, GBDT	TRUE	BiLSTM, LSTM, CNN, RNN, CRNN
	Karamanolakis et al. (2019)					TRUE	weighted average of (CNN + softmax) & (CNN + BiGRU + attention)
	Kate et al. (2014a)	TRUE	keyword search	TRUE	3CSVM, SVM, TSVM, TSVM-Meta
	Kate et al. (2014b)			TRUE	Multinomial Naive Bayes, k-NN and SVM
	Lopes-Cardoso et al. (2021)			TRUE	SVM, Random Forest, SGD	TRUE	FastText, CNN, mBERT
	Magalhães et al. (2019)			TRUE	Multinomial Naïve Bayes, Support Vector Machines, Decision Trees, Random Forest, K-Nearest Neighbors and Logistic Regression
	Magalhães et al. (2020)			TRUE	Complement Naïve Bayes, Bernoulli Naïve Bayes, Multinomial Naïve Bayes, Knearest Neighbors, Decision Tree, Random Forest, Support Vector Machine, AdaBoost and Logistic Regression
	Makridis et al. (2023)	TRUE	hierarchical classification model based on proprietary ontology
	Maphenduka et al. (2024)			TRUE	Logistic regression
	Mejia et al. (2019)			TRUE	Naïve Bayes, SVM, Logistic Regression with Lasso
	Monakhova et al. (2011)			TRUE	SVM, PCA
	N. Lee et al. (2023)			TRUE	Support Vector Machines, Decision Tree, Logistic Regression, Naive Bayes, k-Nearest Neighbour, Adaboost, Random Forest	TRUE	BERT, XLNet, DistilBERT
	Randl et al. (2024)							TRUE	prompting
	Sadilek et al. (2013)			TRUE	SVM
	Schomberg et al. (2016)			TRUE	LogReg
	Shang et al. (2023)					TRUE	LSTM + multi scale CNN
	Shiyong Xiong & Bai (2023)					TRUE	BERT
	Shufeng Xiong et al. (2023)					TRUE	Transformer
	Tao et al. (2023a)					TRUE	BERTweet
	Tao et al. (2023b)			TRUE	SVM, LR, RF, NB
	van den Bulk et al. (2022)			TRUE	LR, SVM, NB, RF, Ada Boost, Gradient Boosting	TRUE	LSTM, BERT
	Y. Zhang et al. (2024)					TRUE	BiLSTM combined with CNN + Attention
	Z. Liu et al. (2020)					TRUE	mBERT
	Z. Wang et al. (2017)			TRUE	NB, SVM, RF	TRUE	RNN
	Zuo et al. (2022)					TRUE	unspecified NN + "relational attention mechanism" developed by the authors

## Sheet: TC_BinaryvsMulti
	Study	Binary vs multi-class classification	Binary class - Classified/mentioned under	Multi class - Classified/mentioned under
	B. Song et al. (2020)	M	not binary classification	impact of news on food safety scene
	B. Song et al. (2022)	M	not binary classification	impact of news on food safety scene
	Barbosa et al. (2019)	M	not binary classification	economic activity a complaint is mentioning
	C. K. H. Lee (2023)	B	indicating violations of food establishments	not multi-class classification
	Chang et al. (2020)	B	edible oil invoices vs non-edible oil invoices	not multi-class classification
	Chung et al. (2019)	B	tweet relevant to food poisoning case of Company A	not multi-class classification
	Dong et al. (2020)	B	text related to food safety	not multi-class classification
	Dongyu Zhang et al. (2024)	B	mentioning foodborne illness	not multi-class classification
	Effland et al. (2018)	B	mentioning foodborne illness	not multi-class classification
	F. L. Yang et al. (2012)	B	spam opinion identification	not multi-class classification
	Filgueiras et al. (2019)	M + B	complaint relevant to ASAE or not	economic activity a complaint is mentioning + severity of the infraction
	Gao et al. (2021)	B	mentioning foodborne illness	not multi-class classification
	Goldberg et al. (2022)	B	indicating hazard/suspicious product	not multi-class classification
	H. Li et al. (2013)	unspecified	not indicated	not indicated
	Hassani (2024)	M	not binary classification	emphasised concept in food safety regulation
	Hu et al. (2022)	B	mentioning foodborne illness	not multi-class classification
	Hu et al. (2023)	B	mentioning foodborne illness	not multi-class classification
	Huang et al. (2022)	B	indicating hazard/suspicious product	not multi-class classification
	Karamanolakis et al. (2019)	B	mentioning foodborne illness	not multi-class classification
	Kate et al. (2014a)	B	text related to food safety	not multi-class classification
	Kate et al. (2014b)	B	indicating violations of food establishments	not multi-class classification
	Lopes-Cardoso et al. (2021)	M + B	complaint relevant to ASAE or not	economic activity a complaint is mentioning + severity of the infraction
	Magalhães et al. (2019)	M	not binary classification	compotent authority
	Magalhães et al. (2020)	M	not binary classification	economic activity a complaint is mentioning
	Makridis et al. (2023)	M	not binary classification	broader category of food
	Maphenduka et al. (2024)	B	ingredient list containing allergen or not	not multi-class classification
	Mejia et al. (2019)	B	indicating violations of food establishments	not multi-class classification
	Monakhova et al. (2011)	B	indicating hazard/suspicious product	not multi-class classification
	N. Lee et al. (2023)	B + M	mentioning foodborne illness, mentioning food recall	different levels of complaint urgencies
	Randl et al. (2024)	M	not binary classification	standardised product, hazard, product categories and hazard categories mentioned
	Sadilek et al. (2013)	B	mentioning foodborne illness	not multi-class classification
	Schomberg et al. (2016)	B	indicating violations of food establishments	not multi-class classification
	Shang et al. (2023)	B	indicating violations of food establishments	not multi-class classification
	Shiyong Xiong & Bai (2023)	B	text related to food safety	not multi-class classification
	Shufeng Xiong et al. (2023)	M	not binary classification	type of food safety event (shoddy product, additives etc.)
	Tao et al. (2023a)	B	mentioning foodborne illness	not multi-class classification
	Tao et al. (2023b)	M	not binary classification	pathogen predicted from food
	van den Bulk et al. (2022)	B	abstract relevant to chemical hazards in leafy greens or cereals	not multi-class classification
	Y. Zhang et al. (2024)	B	text related to food safety	not multi-class classification
	Z. Liu et al. (2020)	B	mentioning foodborne illness	not multi-class classification
	Z. Wang et al. (2017)	B	mentioning foodborne illness	not multi-class classification
	Zuo et al. (2022)	B	indicating hazard/suspicious product	not multi-class classification

## Sheet: SA_Algorithms
	Study	Rule-based	Specific algorithms	Specify lexicon/dictionary	Classical ML	Specific algorithms	Deep learning	Specific algorithms	LLMs	Specific approach
	C. K. H. Lee (2023)	TRUE	VADER algorithm
	C. Song et al. (2020)	TRUE	Boson NLP emotional polarity dictionary + negative/adverbs introduced to scoring	Boson NLP
	Chung et al. (2019)	True, but also as input SL algo	LIWC	LIWC	TRUE	not specified
	F. Li et al. (2015)	TRUE	lexicon-based
	H. Zhang et al. (2023)	TRUE	lexicon-based + degree dictionary + inversion dictionary		TRUE	SVM	TRUE	MLP, LSTM, pre-trained Senta
	Hsieh et al. (2012)	TRUE	lexicon-based + polysemy/adverb of degree/negation handling
	Latino et al. (2023)	TRUE	lexicon-based
	Murphy et al. (2022)	TRUE	VADER algorithm
	Prabhune et al. (2024)						TRUE	BERT
	R. Liu et al. (2023)						TRUE	not specified, Baidu AI Cloud
	Tse et al. (2016)	TRUE	use of a dictionary + averaging tweet scores	Hu and Liu (2004) (https://people.cs.pitt.edu/~wiebe/courses/CS3730/Spring2013/Papers/huliu2004.pdf)
	Vasilescu et al. (2023)	TRUE	Wordscores (which actually compares texts to reference texts and scales them)	Wordscores
	Xia et al. (2022)	TRUE	Snow NLP mapping words to scores + threshold for positive and negative
	Y. Li et al. (2021)						TRUE	BiLSTM +attention + CNN
	Y. Lu et al. (2015)	True, but as input to SVM	lexicon-based + also emoticons are manually classified into 3 classes	Hownet dictionary, DTU dictionary, NTU dictionary	TRUE	SVM
	Y. Song et al. (2016)				TRUE	SVM
	Z. Xu et al. (2024)						TRUE	pre-trained model SKEP

## Sheet: SA_ExtraRemarks
	Study	Specific emotions also involved?	Sentiment analysis outputs inform another prediction model?
	C. K. H. Lee (2023)	TRUE	TRUE
	C. Song et al. (2020)	FALSE	FALSE
	Chung et al. (2019)	FALSE	FALSE
	F. Li et al. (2015)	FALSE	FALSE
	H. Zhang et al. (2023)	FALSE	FALSE
	Hsieh et al. (2012)	FALSE	FALSE
	Latino et al. (2023)	TRUE	FALSE
	Murphy et al. (2022)	FALSE	FALSE
	Prabhune et al. (2024)	FALSE	TRUE
	R. Liu et al. (2023)	FALSE	FALSE
	Tse et al. (2016)	FALSE	FALSE
	Vasilescu et al. (2023)	FALSE	FALSE
	Xia et al. (2022)	FALSE	FALSE
	Y. Li et al. (2021)	FALSE	FALSE
	Y. Lu et al. (2015)	FALSE	TRUE
	Y. Song et al. (2016)	TRUE	TRUE
	Z. Xu et al. (2024)	FALSE	FALSE

## Sheet: TM_Algorithms
	Study	Rule-based	Specific algorithms	Classical ML	Specific algorithms	Deep learning	Specific algorithms	LLMs	Specific approach
	An (2024)			TRUE	structural topic modelling
	C. Song et al. (2020)			TRUE	LDA
	C. Song et al. (2022)			TRUE	LDA
	Gao et al. (2021)			TRUE	CRF regularized topic model, LDA, Biterm topic modelling	TRUE	Miao et al. (2017)
	Glowacki et al. (2019)	unspecified
	H. Xu et al. (2024)			TRUE	LDA
	Huang et al. (2022)			TRUE	LDA
	Klochikhin & Fealing (2017)			TRUE	LDA
	Klochikhin & Lane (2017)			TRUE	supervised hierarchical LDA
	Liang et al. (2011)			TRUE	CHI-LDA
	Maier et al. (2018)			TRUE	Hierarchical Dirichlet process
	R. Liu et al. (2023)			TRUE	LDA
	Sattari et al. (2017)			TRUE	supervised hierarchical LDA
	Xia et al. (2022)			TRUE	Biterm topic modelling
	Z. Xu et al. (2024)			TRUE	LDA
	Zhou et al. (2012)			TRUE	unspecified probabilistic topic model

## Sheet: TM_ExtraRemarks
	Study	Displayed topics with words most associated with them?	If there was extra analysis, describe
	An (2024)	TRUE	built a network of topics to understand how they were related
	C. Song et al. (2020)	TRUE	FALSE
	C. Song et al. (2022)	TRUE	extensive background context to explain why certain words and topics came up
	Gao et al. (2021)	FALSE	FALSE
	Glowacki et al. (2019)	TRUE	FALSE
	H. Xu et al. (2024)	TRUE	FALSE
	Huang et al. (2022)	TRUE	FALSE
	Klochikhin & Fealing (2017)	TRUE	FALSE
	Klochikhin & Lane (2017)	TRUE	FALSE
	Liang et al. (2011)	FALSE	FALSE
	Maier et al. (2018)	TRUE	identified the webpages that were the most relevant to each topic and identified the concentration of different actors within each topic, using the domains of webpages
	R. Liu et al. (2023)	TRUE	FALSE
	Sattari et al. (2017)	FALSE	FALSE
	Xia et al. (2022)	TRUE	extensive background context to explain why certain words and topics came up
	Z. Xu et al. (2024)	TRUE	FALSE
	Zhou et al. (2012)	FALSE	FALSE

## Sheet: IE_Algorithms
	Study	Rule-based	Specific algorithms	Classical ML	Specific algorithms	Deep learning	Specific algorithms	LLMs	Specific approach
	Chen et al. (2024)					TRUE	feed forward neural network
	Dongyu Zhang et al. (2024)							TRUE	prompting
	F. L. Yang et al. (2012)	TRUE	pre-specified rules combined with ontologies
	Gillani & Ko (2014)	TRUE	association mining
	Hu et al. (2022)					TRUE	RoBERTa, BiLSTM, MGADE
	Kuttiyapillai & Rajeswari (2015)			TRUE	kNN
	N. Lee et al. (2023)	TRUE	BERT + knowledge base			TRUE	BERT + knowledge base
	Narasimhan et al. (2016)					TRUE	deep Q network based RL
	Novoa et al. (2024)	TRUE	significance testing for co-occurrence frequencies
	Qi et al. (2019)	TRUE	dependency parsing
	Sonnenburg et al. (2024)							TRUE	finetuning + prompting
	Tao et al. (2023a)					TRUE	BERTTweet, RoBERTa, BiLSTM, MGADE
	X. Yang et al. (2012)	TRUE	similarities of words from documents compared to hazard terms from an ontology (Hownet)
	Y. Li et al. (2021)			TRUE	BiLSTM + CRF	TRUE	BiLSTM + CRF
	Yu (2018)	TRUE	some seed words compared to terms from documents with Hownet
	Zhao et al. (2024)					TRUE	BERT + BiLSTM + attention

## Sheet: IE_ExtraRemarks
	Study	Classified/mentioned under
	Chen et al. (2024)	entities involved in specific relations
	Dongyu Zhang et al. (2024)	extraction of event attributes
	F. L. Yang et al. (2012)	extraction of event attributes
	Gillani & Ko (2014)	extraction of any relation between entities of interest
	Hu et al. (2022)	extraction of event attributes
	Kuttiyapillai & Rajeswari (2015)	entities involved in specific relations
	N. Lee et al. (2023)	extraction of event attributes
	Narasimhan et al. (2016)	extraction of event attributes
	Novoa et al. (2024)	entities involved in specific relations
	Qi et al. (2019)	extraction of event attributes, extraction of any relation between entities of interest
	Sonnenburg et al. (2024)	extraction of event attributes
	Tao et al. (2023a)	extraction of event attributes
	X. Yang et al. (2012)	extraction of event attributes
	Y. Li et al. (2021)	extraction of event attributes
	Yu (2018)	extraction of event attributes
	Zhao et al. (2024)	entities involved in specific relations

## Sheet: NER_Algorithms
	Study	Rule-based	Specific algorithms	Classical ML	Specific algorithms	Deep learning	Specific algorithms
	Amato et al. (2020)	TRUE	gazettes, grammars
	Chen et al. (2024)					TRUE	Projected Gradient Descent + Global Pointer
	Chenze et al. (2022)					TRUE	Transformer architecture from spaCy
	Dachuan Zhang et al. (2020)	TRUE	dictionary-based approach	TRUE	CRF
	Dong et al. (2021)			TRUE	BiLSTM + CRF	TRUE	BiLSTM + CRF
	E. Lee et al. (2021)					TRUE	CNN from spaCy, Transformer from spaCy
	Hu et al. (2022)					TRUE	RoBERTa, BiLSTM, MGADE
	Makridis et al. (2023)					TRUE	CNN from spaCy
	N. Lee et al. (2023)					TRUE	BERT
	Q. Wang et al. (2022)			TRUE	BiLSTM + CRF	TRUE	BiLSTM + CRF
	Qi et al. (2019)	unspecified
	Ren et al. (2023)					TRUE	BiLSTM on one side combined with Pooler
	X. K. Zhang & Peng (2022)			TRUE	CRF
	Shiyong Xiong & Bai (2023)			TRUE	BERT + CRF	TRUE	BERT + CRF
	Yuan et al. (2023)			TRUE	ERNIE + BiLSTM + Att + CRF	TRUE	ERNIE + BiLSTM + Att + CRF

[truncated: 5 more sheets: NER_EntityTypes, IR_Algorithms, IR_ExtraRemark, DC_Algorithms, DC_ExtraRemark]
