# Supplementary material
Source: Research Square preprint supplement (doi:10.21203/rs.3.rs-9305529/v1)
Supplement: Supplementary file 4 [file 5fa47d70aa824a4167889151.xlsx]

## Sheet: Study list and links
	Study	DOI or another link
	C. Song et al. (2020)	https://doi.org/10.3390/foods9040511
	C. Song et al. (2022)	https://doi.org/10.3390/foods11213421
	J. S. Liu et al. (2024)	https://doi.org/10.3389/fpubh.2023.1346577
	Rizzoli et al. (2021)	https://doi.org/10.3390/foods10102484
	Sha et al. (2024)	https://www.researchgate.net/publication/383662905_Assessment_of_the_synergy_degree_of_China's_food_safety_risk_governance_policy_tools_based_on_text_mining_and_machine_learning_methods#:~:text=Existing%20studies%20have%20overlooked%20the%20synergistic%20e%EF%AC%80ects%20among%20policy%20tools,level%20are%20crucial%20for%20enhancing
	Tiozzo et al. (2020)	https://doi.org/10.2196/23438
	Yue et al. (2015)	https://doi.org/10.1016/j.datak.2015.04.008
	Chen et al. (2024)	https://doi.org/10.1109/TMM.2024.3373249
	Dongyu Zhang et al. (2024)	https://doi.org/10.1109/BigData62323.2024.10825369
	F. L. Yang et al. (2012)	https://doi.org/10.1049/cp.2012.2399
	Gillani & Ko (2014)	https://doi.org/10.1007/978-3-319-10178-1_8
	Hu et al. (2022)	https://aclanthology.org/2022.lrec-1.668/
	Kuttiyapillai & Rajeswari (2015)	https://doi.org/10.1504/IJDMB.2015.070072
	N. Lee et al. (2023)	https://doi.org/10.1109/ICISS59129.2023.10291540
	Narasimhan et al. (2016)	https://doi.org/10.18653/v1/d16-1261
	Novoa et al. (2024)	https://doi.org/10.1016/j.fct.2024.114638
	Qi et al. (2019)	https://doi.org/10.1088/1742-6596/1237/2/022159
	Sonnenburg et al. (2024)	https://doi.org/10.1016/j.tox.2024.153933
	Tao et al. (2023a)	https://doi.org/10.3390/foods12142769
	X. Yang et al. (2012)	https://doi.org/10.1007/978-3-642-31020-1_19
	Y. Li et al. (2021)	https://doi.org/10.1145/3433538
	Yu (2018)	https://doi.org/10.1109/CISP-BMEI.2018.8633272
	Zhao et al. (2024)	https://doi.org/10.1007/s13042-024-02304-2
	Bowei et al. (2012)	https://doi.org/10.1109/ICSESS.2012.6269402
	Dachuan Zhang et al. (2020)	https://doi.org/10.1016/j.foodchem.2020.126470
	Han et al. (2012)	https://doi.org/10.1109/WCICA.2012.6357969
	Karthick et al. (2024)	https://doi.org/10.1109/I-SMAC61858.2024.10714868
	Kate et al. (2014a)	https://doi.org/10.1145/2623330.2623369
	Su et al. (2010)	https://doi.org/10.1109/WCICA.2010.5554839
	Y. Yang et al. (2011)	https://doi.org/10.1109/CCIS.2011.6045028
	Y. Yang et al. (2013)	https://doi.org/10.23919/CJE.2013.10285712
	Zhou et al. (2012)	https://doi.org/10.1109/FSKD.2012.6233856
	J. Wang et al. (2019)	https://doi.org/10.1109/ICMLA.2019.00228
	Amato et al. (2020)	https://doi.org/10.1007/978-3-030-15032-7_102
	Chenze et al. (2022)	https://doi.org/10.1109/IRI54793.2022.00038
	Dong et al. (2021)	https://doi.org/10.1109/CCDC52312.2021.9601522
	E. Lee et al. (2021)	https://doi.org/10.1109/IRI51335.2021.00042
	Makridis et al. (2023)	https://doi.org/10.1007/s10994-022-06151-6
	Q. Wang et al. (2022)	https://doi.org/10.1109/IIP57348.2022.00011
	Ren et al. (2023)	https://doi.org/10.3390/app13158609
	Shiyong Xiong & Bai (2023)	https://doi.org/10.1109/ICFTIC59930.2023.10456298
	X. K. Zhang & Peng (2022)	https://doi.org/10.1007/978-3-031-17120-8_19
	Yuan et al. (2023)	https://doi.org/10.1007/978-3-031-17120-8_19
	Rosyadi et al. (2024)	https://www.researchgate.net/publication/387956246_Ingredients_Identification_Through_Label_Scanning_Using_PaddleOCR_and_ChatGPT_for_Information_Retrieval
	Shi et al. (2022)	https://doi.org/10.1109/ICISCAE55891.2022.9927669
	C. K. H. Lee (2023)	https://tinyurl.com/3ks8zmtu
	Chung et al. (2019)	https://doi.org/10.1108/JCOM-08-2018-0072
	F. Li et al. (2015)	https://doi.org/10.1109/CCBD.2015.36
	H. Zhang et al. (2023)	https://doi.org/10.1016/j.crfs.2023.100468
	Hsieh et al. (2012)	https://aclanthology.org/P12-3028/
	Latino et al. (2023)	https://doi.org/10.13165/IE-23-17-1-09
	Murphy et al. (2022)	https://doi.org/10.1039/d1ra09383e
	Prabhune et al. (2024)	https://doi.org/10.7759/cureus.64426
	R. Liu et al. (2023)	https://doi.org/10.3390/foods12051033
	Tse et al. (2016)	https://doi.org/10.1108/IMDS-10-2015-0417
	Vasilescu et al. (2023)	https://doi.org/10.1177/13634593231173807
	Xia et al. (2022)	https://doi.org/10.3390/foods11182909
	Y. Lu et al. (2015)	https://aclanthology.org/Y15-1065/
	Y. Song et al. (2016)	https://doi.org/10.1016/j.chb.2016.02.086
	Z. Xu et al. (2024)	https://doi.org/10.20965/jaciii.2024.p0990
	B. Song et al. (2020)	https://doi.org/10.3233/ATDE200094
	B. Song et al. (2022)	https://doi.org/10.1155/2022/8971882
	Barbosa et al. (2019)	https://doi.org/10.1007/978-3-030-31372-2_21
	Chang et al. (2020)	https://doi.org/10.1371/journal.pone.0228035
	Dong et al. (2020)	https://doi.org/10.1109/AEECA49918.2020.9213565
	Effland et al. (2018)	https://doi.org/10.1093/jamia/ocx093
	Filgueiras et al. (2019)	https://doi.org/10.18653/v1/D19-5107
	Gao et al. (2021)	https://doi.org/10.1007/978-3-030-90888-1_28
	Goldberg et al. (2022)	https://doi.org/10.1111/risa.13651
	H. Li et al. (2013)	https://doi.org/10.1109/Argo-Geoinformatics.2013.6621967
	Hassani (2024)	https://doi.org/10.1109/RE59067.2024.00065
	Hu et al. (2023)	https://doi.org/10.1109/BigData59044.2023.10386694
	Huang et al. (2022)	https://doi.org/10.1155/2022/4209732
	Karamanolakis et al. (2019)	https://doi.org/10.18653/v1/D19-5501
	Kate et al. (2014b)	https://doi.org/10.3233/978-1-61499-432-9-1090
	Lopes-Cardoso et al. (2021)	https://doi.org/10.3390/info12120525
	Magalhães et al. (2019)	https://doi.org/10.33965/bigdaci2019_201907c025
	Magalhães et al. (2020)	https://doi.org/10.1007/978-3-030-45691-7_41
	Maphenduka et al. (2024)	https//doi.org/10.1109/ZCICT63770.2024.10958300
	Mejia et al. (2019)	https://doi.org/10.1287/isre.2019.0866
	Monakhova et al. (2011)	https://www.researchgate.net/profile/Dirk-Lachenmeier/publication/224941135_Automated_Classification_of_Web_Pages_for_Identification_of_Suspicious_Food_Products_-_a_Feasibility_Study/links/5d35c2a392851cd0467c58e9/Automated-Classification-of-Web-Pages-for-Identification-of-Suspicious-Food-Products-a-Feasibility-Study.pdf
	Randl et al. (2024)	https://doi.org/10.18653/v1/2024.findings-acl.459
	Sadilek et al. (2013)	https://doi.org/10.1609/hcomp.v1i1.13069
	Schomberg et al. (2016)	https://doi.org/10.1371/journal.pone.0152117
	Shang et al. (2023)	https://doi.org/10.1145/3633598.3633613
	Shufeng Xiong et al. (2023)	https://doi.org/10.1016/j.heliyon.2023.e17806
	Tao et al. (2023b)	https://doi.org/10.3390/foods12203825
	van den Bulk et al. (2022)	https://doi.org/10.1016/j.crfs.2021.12.010
	Y. Zhang et al. (2024)	https://doi.org/10.28991/HIJ-2024-05-01-013
	Z. Liu et al. (2020)	https://doi.org/10.18653/v1/2020.louhi-1.15
	Z. Wang et al. (2017)	https://doi.org/10.1145/3152178.3152192
	Zuo et al. (2022)	https://doi.org/10.1007/s00003-022-01367-z
	Rocchietti et al. (2024)	https://ceur-ws.org/Vol-3802/paper27.pdf
	An (2024)	https://doi.org/10.1108/SRJ-07-2023-0412
	Glowacki et al. (2019)	https://doi.org/10.1016/j.ajic.2019.04.004
	H. Xu et al. (2024)	https://doi.org/10.1016/j.clrc.2024.100212
	Klochikhin & Fealing (2017)	https://doi.org/10.1017/9781316671788.011
	Klochikhin & Lane (2017)	https://doi.org/10.1017/9781316671788.005
	Liang et al. (2011)	https://doi.org/10.1049/cp.2011.1438
	Maier et al. (2018)	https://doi.org/10.1177/0894439317690337
	Sattari et al. (2017)	https://doi.org/10.1017/9781316671788.006
	Conway et al. (2010)	https://doi.org/10.2196/jmir.1323

## Sheet: social_media
Study	Platform/other
Chenze et al. (2022)	Twitter
Chung et al. (2019)	Twitter
Gao et al. (2021)	Twitter
Glowacki et al. (2019)	Twitter
Han et al. (2012)	blogs
Hsieh et al. (2012)	unspecified
Hu et al. (2022)	Twitter
Hu et al. (2023)	Twitter
Kate et al. (2014b)	user posts from news
E. Lee et al. (2021)	Twitter
Y. Li et al. (2021)	Weibo
J. S. Liu et al. (2024)	Weibo
R. Liu et al. (2023)	Weibo
Y. Lu et al. (2015)	Weibo
Rizzoli et al. (2021)	Facebook
Sadilek et al. (2013)	Twitter
C. Song et al. (2020)	Weibo
Y. Song et al. (2016)	Weibo
Tao et al. (2023a)	Twitter
Tiozzo et al. (2020)	unspecified
Xia et al. (2022)	Zhihu
H. Zhang et al. (2023)	Weibo
F. Li et al. (2015)	microblogs
Murphy et al. (2022)	Twitter
Tse et al. (2016)	Twitter
H. Xu et al. (2024)	Weibo
Z. Xu et al. (2024)	Weibo
Dongyu Zhang et al. (2024)	Twitter

## Sheet: news
Study	Platform/source	General/specific, if platform/source indicated
Dong et al. (2020)	unspecified
Dong et al. (2021)	People's Daily	general
Han et al. (2012)	Sina.com.cn, People's Daily, Xinhua	general
Hsieh et al. (2012)	unspecified
Kate et al. (2014a)	unspecified
Latino et al. (2023)	Italian newspapers (Corriere del mezzogiorno, Quotidiano, La gazzetta del mezzogiorno, La Repubblica et cetera)	general
N. Lee et al. (2023)	unspecified
H. Li et al. (2013)	unspecified
Y. Li et al. (2021)	unspecified
Liang et al. (2011)	Sina (probably Weibo), Sohu News	general
Makridis et al. (2023)	unspecified
Narasimhan et al. (2016)	unspecified
B. Song et al. (2022)	unspecified
B. Song et al. (2020)	unspecified
Su et al. (2010)	foreign agencies
Shiyong Xiong & Bai (2023)	foodmate.net	specific
Shufeng Xiong et al. (2023)	unspecified
Y. Yang et al. (2011)	foodmate.net	specific
H. Zhang et al. (2023)	2494 unspecified news websites
X. K. Zhang & Peng (2022)	People's Daily	general
Conway et al. (2010)	ProMed-Mail, CBC, Reuters, BBC, Vietnam-net, The Nation	Promed-Mail is specific, others are general
F. Li et al. (2015)	unspecified
Rocchietti et al. (2024)	unspecified

## Sheet: product_service_reviews
Study	Review platform	Reviews on	Coming from a previously created dataset?
Amato et al. (2020)	Yelp	restaurants	no
Effland et al. (2018)	Yelp	restaurants	no
Goldberg et al. (2022)	Amazon	products	no
Huang et al. (2022)	Meituan	online food delivery platform	no
Karamanolakis et al. (2019)	Yelp	restaurants	no
C. K. H. Lee (2023)	Yelp	restaurants	no
Z. Liu et al. (2020)	Yelp	restaurants	no
Mejia et al. (2019)	Yelp	restaurants	no
Schomberg et al. (2016)	Yelp	restaurants	no
Z. Wang et al. (2017)	Yelp	restaurants	no
Yuan et al. (2023)	Jingdong	products	no
Y. Zhang et al. (2024)	unspecified	online food delivery platform	yes comes from a dataset originating from a competition
Zuo et al. (2022)	unspecified	online food delivery platform	yes comes from a dataset originating from a competition
Prabhune et al. (2024)	Google Maps	restaurants	no

## Sheet: announcements
Study	Exact content
An (2024)	product recalls
Dong et al. (2020)	test/audit/inspection results
Kuttiyapillai & Rajeswari (2015)	test/audit/inspection results
Makridis et al. (2023)	product recalls
Qi et al. (2019)	food safety event reports
Su et al. (2010)	views or information shared by authorities
Tao et al. (2023b)	historic foodborne outbreak dataset
Shiyong Xiong & Bai (2023)	test/audit/inspection results
H. Zhang et al. (2023)	views or information shared by authorities
Zhou et al. (2012)	food safety emergency report
Randl et al. (2024)	product recalls
Zhao et al. (2024)	views or information shared by authorities

## Sheet: complaints
Study	Complaint recipient/platform
Barbosa et al. (2019)	Portuguese Economic and Food Safety Authority
Filgueiras et al. (2019)	Portuguese Economic and Food Safety Authority
Goldberg et al. (2022)	IWasPoisoned.com
Kate et al. (2014b)	unspecified
N. Lee et al. (2023)	Singapore Food Agency
Lopes-Cardoso et al. (2021)	Portuguese Economic and Food Safety Authority
Magalhães et al. (2019)	Portuguese Economic and Food Safety Authority
Magalhães et al. (2020)	Portuguese Economic and Food Safety Authority
X. Yang et al. (2012)	unspecified
Yu (2018)	315 consumption complaint website from China
Yue et al. (2015)	315 consumption complaint website from China

## Sheet: scientific_texts
Study	Exact type of scientific text	Particular mode of access	Strategies to obtain
van den Bulk et al. (2022)	scientific abstracts	Scopus, Web of Science	query with search terms
J. Wang et al. (2019)	scientific articles	PubMed	query with search terms
Dachuan Zhang et al. (2020)	scientific articles	PubMed	query with search terms
Klochikhin & Fealing (2017)	grants, scientific articles	National Science Foundation, National Institutes of Health, US Dept of Agriculture, Web of Science and many others	query with search terms
Klochikhin & Lane (2017)	grants	National Science Foundation, National Institutes of Health, US Dept of Agriculture	query with search terms
Sattari et al. (2017)	grants	National Science Foundation, National Institutes of Health, US Dept of Agriculture	not specified
Novoa et al. (2024)	scientific articles	PubMed	query with search terms
Rocchietti et al. (2024)	scientific articles	not specified	not specified
Sonnenburg et al. (2024)	Results section of scientific articles	obtained from EFSA's report on BPA	relevant studies were derived from an EFSA publication on BPA

## Sheet: unspecified_websites
Study	Tool
Bowei et al. (2012)	web crawler
Han et al. (2012)	web crawler
Maier et al. (2018)	web crawler
Ren et al. (2023)	unspecified
Tiozzo et al. (2020)	web monitoring app including a web crawler
F. L. Yang et al. (2012)	web crawler
Y. Yang et al. (2013)	web crawler

## Sheet: policy_tools
Study	Remark
Chen et al. (2024)	national, industrial and local standards also from China
Gillani & Ko (2014)	EU legislation, national legislation, authority regulations
C. Song et al. (2022)	national, local regulations from China
Sha et al. (2024)	national, local regulations from China
Hassani (2024)	Focus on Safe Food for Canadians Regulations, Food Specific Requirements and Guidance, parts of food safety regulations from Food and Drug Administration
Karthick et al. (2024)	Indian food safety regulations
