# Supplementary material
Source: Research Square preprint supplement (doi:10.21203/rs.3.rs-9305529/v1)
Supplement: Supplementary file 5 [file f9d90cd1fe4b2861d9fc4099.xlsx]

## Sheet: Sheet1
NLP task	Study	DOI or another link	Food safety purpose(s)	Data source(s)
document clustering	C. Song et al. (2020)	https://doi.org/10.3390/foods9040511	public opinion	social media
	C. Song et al. (2022)	https://doi.org/10.3390/foods11213421	policy analysis	policy tools
	J. S. Liu et al. (2024)	https://doi.org/10.3389/fpubh.2023.1346577	public opinion	social media
	Rizzoli et al. (2021)	https://doi.org/10.3390/foods10102484	consumer empowerment	social media
	Sha et al. (2024)	https://www.researchgate.net/publication/383662905_Assessment_of_the_synergy_degree_of_China's_food_safety_risk_governance_policy_tools_based_on_text_mining_and_machine_learning_methods#:~:text=Existing%20studies%20have%20overlooked%20the%20synergistic%20e%EF%AC%80ects%20among%20policy%20tools,level%20are%20crucial%20for%20enhancing	policy analysis	policy tools
	Tiozzo et al. (2020)	https://doi.org/10.2196/23438	media coverage	social media | unspecified websites
	Yue et al. (2015)	https://doi.org/10.1016/j.datak.2015.04.008	general monitoring	complaints
information extraction	Chen et al. (2024)	https://doi.org/10.1109/TMM.2024.3373249	academic work support	policy tools
	Dongyu Zhang et al. (2024)	https://doi.org/10.1109/BigData62323.2024.10825369	FBI monitoring	social media
	F. L. Yang et al. (2012)	https://doi.org/10.1049/cp.2012.2399	general monitoring	unspecified websites
	Gillani & Ko (2014)	https://doi.org/10.1007/978-3-319-10178-1_8	general monitoring	policy tools
	Hu et al. (2022)	https://aclanthology.org/2022.lrec-1.668/	FBI monitoring	social media
	Kuttiyapillai & Rajeswari (2015)	https://doi.org/10.1504/IJDMB.2015.070072	general monitoring	inspection/incident announcements
	N. Lee et al. (2023)	https://doi.org/10.1109/ICISS59129.2023.10291540	FBI monitoring | PR monitoring	complaints | news
	Narasimhan et al. (2016)	https://doi.org/10.18653/v1/d16-1261	infringement monitoring	news
	Novoa et al. (2024)	https://doi.org/10.1016/j.fct.2024.114638	academic work support	scientific texts
	Qi et al. (2019)	https://doi.org/10.1088/1742-6596/1237/2/022159	general monitoring	inspection/incident announcements
	Sonnenburg et al. (2024)	https://doi.org/10.1016/j.tox.2024.153933	academic work support | CH monitoring	scientific texts
	Tao et al. (2023a)	https://doi.org/10.3390/foods12142769	FBI monitoring	social media
	X. Yang et al. (2012)	https://doi.org/10.1007/978-3-642-31020-1_19	general monitoring	complaints
	Y. Li et al. (2021)	https://doi.org/10.1145/3433538	general monitoring | public opinion	news | social media
	Yu (2018)	https://doi.org/10.1109/CISP-BMEI.2018.8633272	general monitoring	complaints
	Zhao et al. (2024)	https://doi.org/10.1007/s13042-024-02304-2	general monitoring	inspection/incident announcements
information retrieval	Bowei et al. (2012)	https://doi.org/10.1109/ICSESS.2012.6269402	general monitoring	unspecified websites
	Dachuan Zhang et al. (2020)	https://doi.org/10.1016/j.foodchem.2020.126470	academic work support | CH monitoring	scientific texts
	Han et al. (2012)	https://doi.org/10.1109/WCICA.2012.6357969	general monitoring	news | social media | unspecified websites
	Karthick et al. (2024)	https://doi.org/10.1109/I-SMAC61858.2024.10714868	consumer empowerment	policy tools
	Kate et al. (2014a)	https://doi.org/10.1145/2623330.2623369	general monitoring	news
	Su et al. (2010)	https://doi.org/10.1109/WCICA.2010.5554839	general monitoring | public opinion	inspection/incident announcements | news
	Y. Yang et al. (2011)	https://doi.org/10.1109/CCIS.2011.6045028	academic work support	news
	Y. Yang et al. (2013)	https://doi.org/10.23919/CJE.2013.10285712	general monitoring	unspecified websites
	Zhou et al. (2012)	https://doi.org/10.1109/FSKD.2012.6233856	general monitoring | public opinion	inspection/incident announcements
keyword extraction	J. Wang et al. (2019)	https://doi.org/10.1109/ICMLA.2019.00228	FBI monitoring	scientific texts
NER	Amato et al. (2020)	https://doi.org/10.1007/978-3-030-15032-7_102	FBI monitoring	product/service reviews
	Chen et al. (2024)	https://doi.org/10.1109/TMM.2024.3373249	academic work support	policy tools
	Chenze et al. (2022)	https://doi.org/10.1109/IRI54793.2022.00038	consumer empowerment	social media
	Dachuan Zhang et al. (2020)	https://doi.org/10.1016/j.foodchem.2020.126470	academic work support | CH monitoring	scientific texts
	Dong et al. (2021)	https://doi.org/10.1109/CCDC52312.2021.9601522	general monitoring	food safety cases | news
	E. Lee et al. (2021)	https://doi.org/10.1109/IRI51335.2021.00042	consumer empowerment	social media
	Hu et al. (2022)	https://aclanthology.org/2022.lrec-1.668/	FBI monitoring	social media
	Makridis et al. (2023)	https://doi.org/10.1007/s10994-022-06151-6	PR monitoring	inspection/incident announcements | news
	N. Lee et al. (2023)	https://doi.org/10.1109/ICISS59129.2023.10291540	FBI monitoring | PR monitoring	complaints | news
	Q. Wang et al. (2022)	https://doi.org/10.1109/IIP57348.2022.00011	general monitoring	education materials
	Qi et al. (2019)	https://doi.org/10.1088/1742-6596/1237/2/022159	general monitoring	inspection/incident announcements
	Ren et al. (2023)	https://doi.org/10.3390/app13158609	general monitoring	unspecified websites
	Shiyong Xiong & Bai (2023)	https://doi.org/10.1109/ICFTIC59930.2023.10456298	general monitoring	inspection/incident announcements | news
	X. K. Zhang & Peng (2022)	https://doi.org/10.1007/978-3-031-17120-8_19	general monitoring	news
	Yuan et al. (2023)	https://doi.org/10.1007/978-3-031-17120-8_19	general monitoring	product/service reviews
question answering	Karthick et al. (2024)	https://doi.org/10.1109/I-SMAC61858.2024.10714868	consumer empowerment	policy tools
	Rosyadi et al. (2024)	https://www.researchgate.net/publication/387956246_Ingredients_Identification_Through_Label_Scanning_Using_PaddleOCR_and_ChatGPT_for_Information_Retrieval	consumer empowerment	ingredient lists
	Shi et al. (2022)	https://doi.org/10.1109/ICISCAE55891.2022.9927669	general monitoring	education materials
sentiment analysis	C. K. H. Lee (2023)	https://tinyurl.com/3ks8zmtu	infringement monitoring	product/service reviews
	C. Song et al. (2020)	https://doi.org/10.3390/foods9040511	public opinion	social media
	Chung et al. (2019)	https://doi.org/10.1108/JCOM-08-2018-0072	public opinion	social media
	F. Li et al. (2015)	https://doi.org/10.1109/CCBD.2015.36	general monitoring | public opinion	news | social media
	H. Zhang et al. (2023)	https://doi.org/10.1016/j.crfs.2023.100468	general monitoring | public opinion	inspection/incident announcements | news | social media
	Hsieh et al. (2012)	https://aclanthology.org/P12-3028/	general monitoring | public opinion	news | social media
	Latino et al. (2023)	https://doi.org/10.13165/IE-23-17-1-09	public opinion	news
	Murphy et al. (2022)	https://doi.org/10.1039/d1ra09383e	public opinion	social media
	Prabhune et al. (2024)	https://doi.org/10.7759/cureus.64426	infringement monitoring	product/service reviews
	R. Liu et al. (2023)	https://doi.org/10.3390/foods12051033	public opinion	social media
	Tse et al. (2016)	https://doi.org/10.1108/IMDS-10-2015-0417	public opinion	social media
	Vasilescu et al. (2023)	https://doi.org/10.1177/13634593231173807	public opinion	stakeholder opinion
	Xia et al. (2022)	https://doi.org/10.3390/foods11182909	public opinion	social media
	Y. Li et al. (2021)	https://doi.org/10.1145/3433538	general monitoring | public opinion	news | social media
	Y. Lu et al. (2015)	https://aclanthology.org/Y15-1065/	public opinion	social media
	Y. Song et al. (2016)	https://doi.org/10.1016/j.chb.2016.02.086	public opinion	social media
	Z. Xu et al. (2024)	https://doi.org/10.20965/jaciii.2024.p0990	public opinion	social media
text classification	B. Song et al. (2020)	https://doi.org/10.3233/ATDE200094	general monitoring	news
	B. Song et al. (2022)	https://doi.org/10.1155/2022/8971882	general monitoring	news
	Barbosa et al. (2019)	https://doi.org/10.1007/978-3-030-31372-2_21	infringement monitoring	complaints
	C. K. H. Lee (2023)	https://tinyurl.com/3ks8zmtu	infringement monitoring	product/service reviews
	Chang et al. (2020)	https://doi.org/10.1371/journal.pone.0228035	infringement monitoring	e-invoices
	Chung et al. (2019)	https://doi.org/10.1108/JCOM-08-2018-0072	public opinion	social media
	Dong et al. (2020)	https://doi.org/10.1109/AEECA49918.2020.9213565	general monitoring	inspection/incident announcements | news
	Dongyu Zhang et al. (2024)	https://doi.org/10.1109/BigData62323.2024.10825369	FBI monitoring	social media
	Effland et al. (2018)	https://doi.org/10.1093/jamia/ocx093	FBI monitoring	product/service reviews
	F. L. Yang et al. (2012)	https://doi.org/10.1049/cp.2012.2399	general monitoring	unspecified websites
	Filgueiras et al. (2019)	https://doi.org/10.18653/v1/D19-5107	infringement monitoring	complaints
	Gao et al. (2021)	https://doi.org/10.1007/978-3-030-90888-1_28	FBI monitoring	social media
	Goldberg et al. (2022)	https://doi.org/10.1111/risa.13651	OS monitoring	complaints | product/service reviews
	H. Li et al. (2013)	https://doi.org/10.1109/Argo-Geoinformatics.2013.6621967	general monitoring | public opinion	news
	Hassani (2024)	https://doi.org/10.1109/RE59067.2024.00065	policy analysis	policy tools
	Hu et al. (2022)	https://aclanthology.org/2022.lrec-1.668/	FBI monitoring	social media
	Hu et al. (2023)	https://doi.org/10.1109/BigData59044.2023.10386694	FBI monitoring	social media
	Huang et al. (2022)	https://doi.org/10.1155/2022/4209732	OS monitoring	product/service reviews
	Karamanolakis et al. (2019)	https://doi.org/10.18653/v1/D19-5501	FBI monitoring	product/service reviews
	Kate et al. (2014a)	https://doi.org/10.1145/2623330.2623369	general monitoring	news
	Kate et al. (2014b)	https://doi.org/10.3233/978-1-61499-432-9-1090	infringement monitoring	complaints | social media
	Lopes-Cardoso et al. (2021)	https://doi.org/10.3390/info12120525	infringement monitoring	complaints
	Magalhães et al. (2019)	https://doi.org/10.33965/bigdaci2019_201907c025	infringement monitoring	complaints
	Magalhães et al. (2020)	https://doi.org/10.1007/978-3-030-45691-7_41	infringement monitoring	complaints
	Makridis et al. (2023)	https://doi.org/10.1007/s10994-022-06151-6	PR monitoring	inspection/incident announcements | news
	Maphenduka et al. (2024)	https//doi.org/10.1109/ZCICT63770.2024.10958300	consumer empowerment	ingredient lists
	Mejia et al. (2019)	https://doi.org/10.1287/isre.2019.0866	infringement monitoring	product/service reviews
	Monakhova et al. (2011)	https://www.researchgate.net/profile/Dirk-Lachenmeier/publication/224941135_Automated_Classification_of_Web_Pages_for_Identification_of_Suspicious_Food_Products_-_a_Feasibility_Study/links/5d35c2a392851cd0467c58e9/Automated-Classification-of-Web-Pages-for-Identification-of-Suspicious-Food-Products-a-Feasibility-Study.pdf	OS monitoring	product description
	N. Lee et al. (2023)	https://doi.org/10.1109/ICISS59129.2023.10291540	FBI monitoring | PR monitoring	complaints | news
	Randl et al. (2024)	https://doi.org/10.18653/v1/2024.findings-acl.459	PR monitoring	inspection/incident announcements
	Sadilek et al. (2013)	https://doi.org/10.1609/hcomp.v1i1.13069	FBI monitoring	social media
	Schomberg et al. (2016)	https://doi.org/10.1371/journal.pone.0152117	infringement monitoring	product/service reviews
	Shang et al. (2023)	https://doi.org/10.1145/3633598.3633613	fake news	fact-checking platforms
	Shiyong Xiong & Bai (2023)	https://doi.org/10.1109/ICFTIC59930.2023.10456298	general monitoring	inspection/incident announcements | news
	Shufeng Xiong et al. (2023)	https://doi.org/10.1016/j.heliyon.2023.e17806	general monitoring	news
	Tao et al. (2023a)	https://doi.org/10.3390/foods12142769	FBI monitoring	social media
	Tao et al. (2023b)	https://doi.org/10.3390/foods12203825	FBI monitoring	inspection/incident announcements
	van den Bulk et al. (2022)	https://doi.org/10.1016/j.crfs.2021.12.010	academic work support	scientific texts
	Y. Zhang et al. (2024)	https://doi.org/10.28991/HIJ-2024-05-01-013	general monitoring	product/service reviews
	Z. Liu et al. (2020)	https://doi.org/10.18653/v1/2020.louhi-1.15	FBI monitoring	product/service reviews
	Z. Wang et al. (2017)	https://doi.org/10.1145/3152178.3152192	FBI monitoring	product/service reviews
	Zuo et al. (2022)	https://doi.org/10.1007/s00003-022-01367-z	OS monitoring	product/service reviews
text summarization	Karthick et al. (2024)	https://doi.org/10.1109/I-SMAC61858.2024.10714868	consumer empowerment	policy tools
	Rocchietti et al. (2024)	https://ceur-ws.org/Vol-3802/paper27.pdf	general monitoring	news | scientific texts
topic modelling	An (2024)	https://doi.org/10.1108/SRJ-07-2023-0412	PR monitoring	inspection/incident announcements
	C. Song et al. (2020)	https://doi.org/10.3390/foods9040511	public opinion	social media
	C. Song et al. (2022)	https://doi.org/10.3390/foods11213421	policy analysis	policy tools
	Gao et al. (2021)	https://doi.org/10.1007/978-3-030-90888-1_28	FBI monitoring	social media
	Glowacki et al. (2019)	https://doi.org/10.1016/j.ajic.2019.04.004	public opinion	social media
	H. Xu et al. (2024)	https://doi.org/10.1016/j.clrc.2024.100212	public opinion	social media
	Huang et al. (2022)	https://doi.org/10.1155/2022/4209732	OS monitoring	product/service reviews
	Klochikhin & Fealing (2017)	https://doi.org/10.1017/9781316671788.011	academic work support	scientific texts
	Klochikhin & Lane (2017)	https://doi.org/10.1017/9781316671788.005	academic work support	scientific texts
	Liang et al. (2011)	https://doi.org/10.1049/cp.2011.1438	general monitoring	news
	Maier et al. (2018)	https://doi.org/10.1177/0894439317690337	public opinion	unspecified websites
	R. Liu et al. (2023)	https://doi.org/10.3390/foods12051033	public opinion	social media
	Sattari et al. (2017)	https://doi.org/10.1017/9781316671788.006	academic work support	scientific texts
	Xia et al. (2022)	https://doi.org/10.3390/foods11182909	public opinion	social media
	Z. Xu et al. (2024)	https://doi.org/10.20965/jaciii.2024.p0990	public opinion	social media
	Zhou et al. (2012)	https://doi.org/10.1109/FSKD.2012.6233856	general monitoring | public opinion	inspection/incident announcements
